# Supplementary material for: A temperature-responsive poly(vinyl alcohol) gel for controlling fluidity of an inorganic phase change material
Source: Royal Society of Chemistry journal article supplement (doi:10.1039/c7ta02897k), 2017-01-01
Supplement: c7ta02897k1.pdf [file c7ta02897k1.pdf]

## Supplementary Information

### A Temperature-Responsive Poly (vinyl alcohol) Gel for Controlling Fluidity of an Inorganic Phase Change Material

Parvin Karimineghlani,<sup>a</sup> Emily Emmons,<sup>a</sup> Micah J. Green,<sup>b</sup> Patrick Shamberger,<sup>a\*</sup> and Svetlana Sukhishvili<sup>a\*</sup>

<sup>a</sup> Department of Material Science and Engineering, Texas A&M University, College Station, 77843, TX, USA

<sup>b</sup> Artie McFerrin Department of Chemical Engineering, Texas A&M University, College Station, 77843, TX, USA

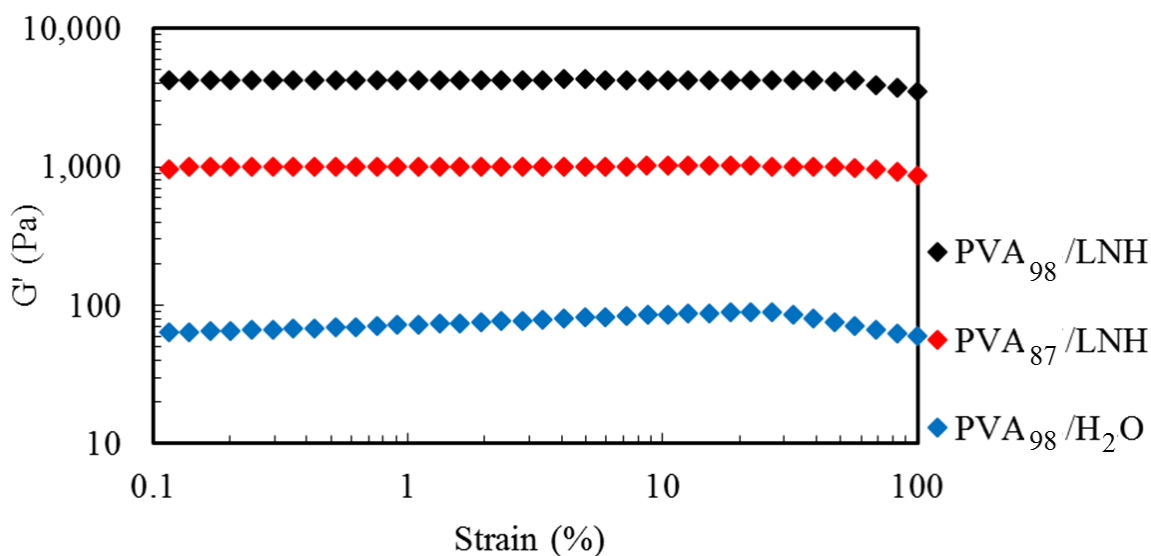

**Fig. S1.** Strain-dependent  $G'$  for 15 wt% PVA solutions in LNH and H<sub>2</sub>O for 87% and 98% degrees of PVA hydrolysis. Testing was conducted at a temperature of 25 °C with an angular frequency of 10 rad/s.

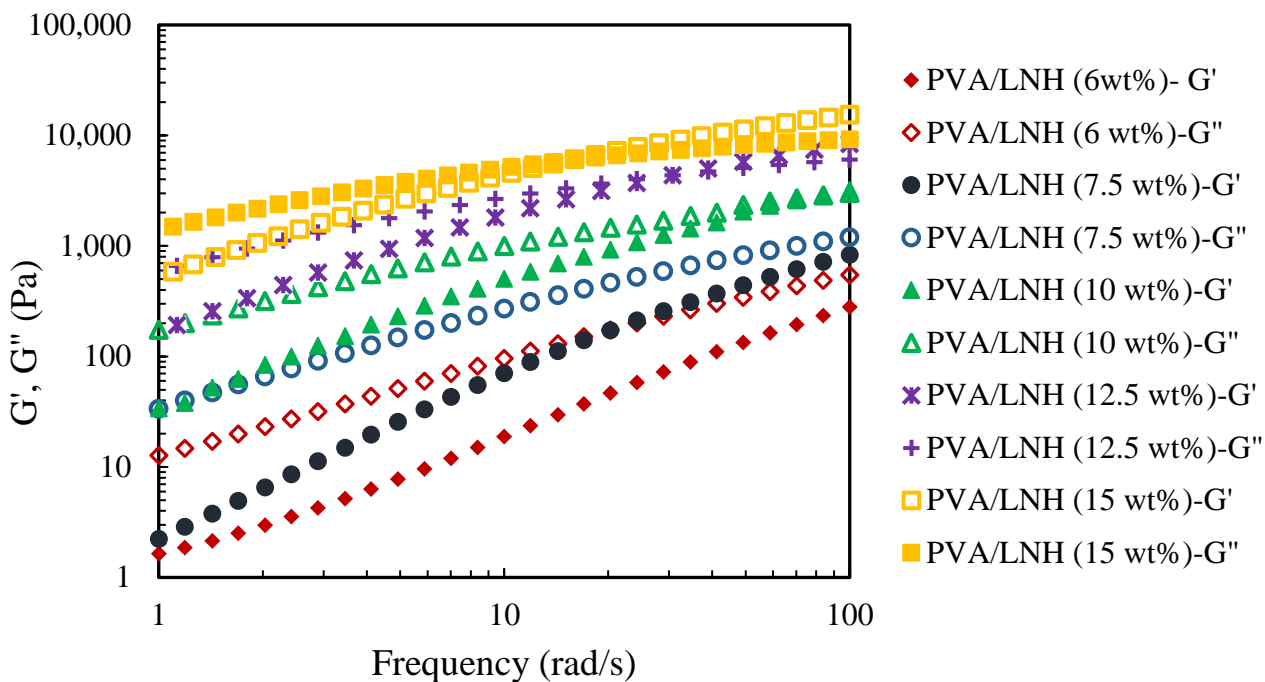

**Fig. S2.** Frequency dependencies of  $G'$  and  $G''$  in PVA<sub>98</sub>/LNH system at different polymer concentrations. Temperature was 25 °C. Measurements were performed at  $\gamma_L = 1\%$ .

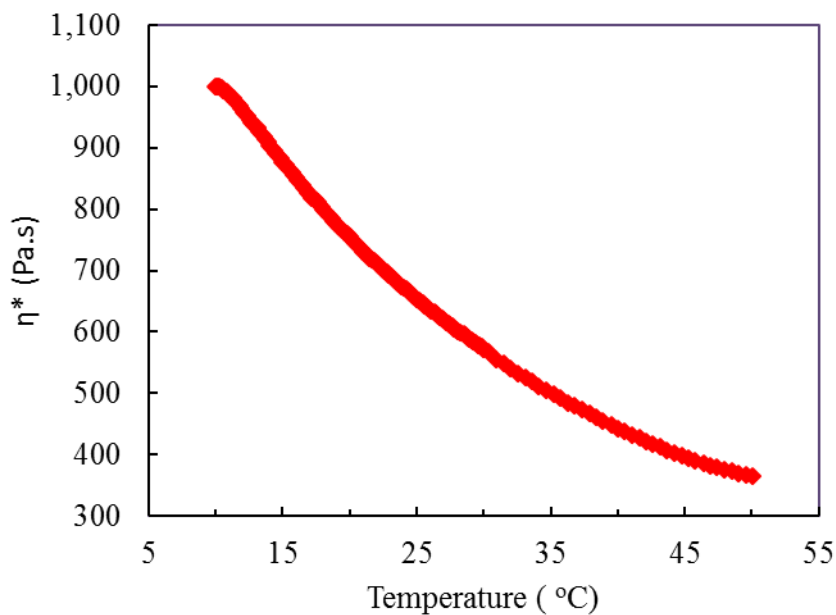

**Fig. S3.** Complex viscosity of PVA/LNH gels as a function of temperature during heating. Testing was conducted at an angular frequency of 10 rad/s and  $\gamma_L = 10\%$ .
